# Supplementary material for: An extremely high power factor in Seebeck effects based on a new n-type copper-based organic/inorganic hybrid C6H4NH2CuBr2I film with metal-like conductivity
Source: Royal Society of Chemistry journal article supplement (doi:10.1039/c7ta03015k), 2017-01-01
Supplement: c7ta03015k1.pdf [file c7ta03015k1.pdf]

***Supporting Information***

**Extremely High Power Factor in Seebeck Effects Based on New N-  
Type Copper-Based Organic/Inorganic Hybrid C<sub>6</sub>H<sub>4</sub>NH<sub>2</sub>CuBr<sub>2</sub>I Film  
with Metallic-Like Conductivity**

*Yuchun Liu<sup>1\*</sup>, Xiaolei Li<sup>2\*</sup>, Ling Xu<sup>1</sup>, Jinbin Wang<sup>2</sup>, Bin Hu<sup>1,3,4†</sup>*

*1 Wuhan National Laboratory for Optoelectronics, Huazhong University of Science and Technology, Wu Han 430074, China*

*2 School of Materials Science and Engineering, Xiangtan University, Xiangtan 411105, China*

*3 College of Science, Beijing Jiaotong University, Beijing 1000444, China*

*4 Department of Materials Science and Engineering, University of Tennessee, Knoxville, TN 37996, USA*

*†Corresponding authors.*

*E-mail address: [bhu@utk.edu](mailto:bhu@utk.edu).*

## 1. The crystallographic parameter for C<sub>6</sub>H<sub>4</sub>NH<sub>2</sub>CuBr<sub>2</sub>I Powder Rietveld Refinement

| Table S1. The crystallographic parameter for C <sub>6</sub> H <sub>4</sub> NH <sub>2</sub> CuBr <sub>2</sub> I<br>( from Powder Rietveld Refinement) <sup>[1]</sup> |           |
|---------------------------------------------------------------------------------------------------------------------------------------------------------------------|-----------|
| Wavelength                                                                                                                                                          | 0.71073Å  |
| Temperature                                                                                                                                                         | 298 K     |
| 2-theta range                                                                                                                                                       | 10~90°    |
| Step size                                                                                                                                                           | 0.02°     |
| Number of point                                                                                                                                                     | 4000      |
| Crystal system                                                                                                                                                      | hexagonal |
| Space group                                                                                                                                                         | R3        |
| a (b)                                                                                                                                                               | 3.963(3)Å |
| c                                                                                                                                                                   | 9.698(5)Å |
| $\alpha(\beta)$                                                                                                                                                     | 90°       |
| $\gamma$                                                                                                                                                            | 120°      |
| R <sub>wp</sub>                                                                                                                                                     | 5.03%     |
| R <sub>exp</sub>                                                                                                                                                    | 1.02%     |
| R <sub>p</sub>                                                                                                                                                      | 3.83%     |
| GOF                                                                                                                                                                 | 4.20%     |
| Z                                                                                                                                                                   | 3         |

## 2. The thermal conductivity for C<sub>6</sub>H<sub>4</sub>NH<sub>2</sub>CuBr<sub>2</sub>I sample

The thermal conductivity ( $\kappa$ ) can be determined according to the equation:  $\kappa = \kappa_e + \kappa_l$ , where  $\kappa_e$  and  $\kappa_l$  is the electronic contribution and lattice contribution, respectively. The electronic part of thermal conductivity  $\kappa_e$  was derived from the measured electrical conductivity according to the Wiedemann–Franz law:  $\kappa_e = L\sigma T$ , where  $L$  is the Lorenz number. Generally, Lorenz number could be

estimated as  $L_0 = \frac{\pi^2}{3} \left( \frac{k_B}{e} \right)^2 \sim 2.45 \times 10^{-8} \text{ V}^2/\text{K}^2$  for free electrons, which is suitable for the metals. For most thermoelectric materials, the true Lorenz number is in fact lower than  $L_0$ , depending on the reduced Fermi energy  $\xi = E_F/k_B T$  and scattering parameter  $r$ .<sup>[2-3]</sup> Assuming the main carrier scattering mechanism around room temperature is the acoustic phonon scattering,  $r$  could be  $-1/2$ . Then the Lorenz number  $L$  can be given as the following:

$$L = \left( \frac{k_B}{e} \right)^2 \left( \frac{3F_0(\xi)F_2(\xi) - 4F_1^2(\xi)}{F_0^2(\xi)} \right)$$

where  $F_n(\xi)$  is defined as the Fermi integration

$$F_n(\xi) = \int_0^\infty \frac{\chi^n}{1 + e^{\chi - \xi}} d\chi$$

Based on the single band approximation,

$$n = 4\pi \left( \frac{2m^* k_B T}{h^2} \right)^{3/2} F_{1/2}(\xi)$$

$$S = \pm \left( \frac{2F_1(\xi)}{F_0(\xi)} - \xi \right)$$

$L$  values were calculated to be  $\sim 1.5 \times 10^{-8} \text{ V}^2/\text{K}^2$ . Since the electrical conductivity decrease with the temperature, the  $\kappa_e$  exhibits a decrease-to-increase trend with temperature, as shown in Figure 7(b). At room temperature,  $\kappa_e$  of  $\text{C}_6\text{H}_4\text{NH}_2\text{CuBr}_2\text{I}$  is about  $1.6 \text{ W/m}\cdot\text{K}$ .

To analyses the lattice thermal conductivity  $\kappa_L$ , the Slack's model as empirical formula should be given by:

$$\kappa_L = A \frac{M\theta_D^3 \delta}{\gamma^2 n^{2/3} T}$$

Here  $n$  is the number of atoms in the primitive unit cell,  $\delta^3$  is the volume per atom,  $\theta_D$

is the Debye temperature,  $M$  is the average of the atoms in the crystal,  $\gamma$  is the Grüneisen parameter, and  $A$  is a collection of physical constants ( $A \sim 3.1 \times 10^{-6}$  if  $\kappa$  is in  $\text{W/m}\cdot\text{K}$ ,  $M$  in amu, and  $\delta$  in Angstroms)<sup>[4]</sup>. The Debye temperature is estimated by

$$\theta_D \approx \frac{h}{k_B} \left( \frac{v_m}{\delta} \right),$$

where  $v_m$  is the mean sound velocity. Ignoring affect of temperature

on the anharmonicity of the bond, the  $\kappa_L$  could be proportional to the  $T^{-1}$ .

| <b>Table S2.</b> The value of parameter for lattice thermal conductivity calculation |           |    |              |                            |                |                     |
|--------------------------------------------------------------------------------------|-----------|----|--------------|----------------------------|----------------|---------------------|
| A                                                                                    | $M$ (amu) | n  | $\delta$ (Å) | $v_m$ (m/s)                | $\theta_D$ (K) | $\gamma$            |
| $\sim 3.1 \times 10^{-6}$                                                            | 442.3     | 17 | 7.342        | $\sim 1800$ <sup>[5]</sup> | 117.8          | 2.03 <sup>[6]</sup> |

---

<sup>[1]</sup> X. Li, X. Zhong, Y. Hu, B. Li, *et al. Phys. Chem. Lett.*, 2017, 8 (8), 1804-1809.

<sup>[2]</sup> D. M. Rowe, C. M. Bhandari. *Modern Thermoelectrics*, Holt, Rinehart and Winston, 1993

<sup>[3]</sup> W. T. Chiu , C. L. Chen , Y. Y. Chen, *Scientific Reports*, 2016, 6: 23143

<sup>[4]</sup> D. T. Morelli, V. Jovic, J. P. Heremans, *Phys. Rev. Lett.* 2008, 101, 035901.

<sup>[5]</sup> J. Feng, *APL Mater.* 2014, 2, 081801.

<sup>[6]</sup> J. Serrano, A. H. Romero, F. J. Manjón, R. Lauck, M. Cardona, A. Rubio, *Phys. Rev. B*, 2004, 69, 094306.
